# Supplementary material
Source: publisher figshare collection journal article supplement (https://acs.figshare.com/ndownloader/files/21753441)
Supplement: Supplementary file 1 [file 21753441]

## Supporting Information

### Role of the O4 Channel in Photosynthetic Water Oxidation as Revealed by Fourier Transform Infrared Difference and Time-Resolved Infrared Analysis of the D1-S169A Mutant

Yuichiro Shimada, Tomomi Kitajima-Ihara, Ryo Nagao, Takumi Noguchi

*Division of Material Science, Graduate School of Science, Nagoya University, Furo-cho, Chikusa-ku, Nagoya, 464-8602, Japan*

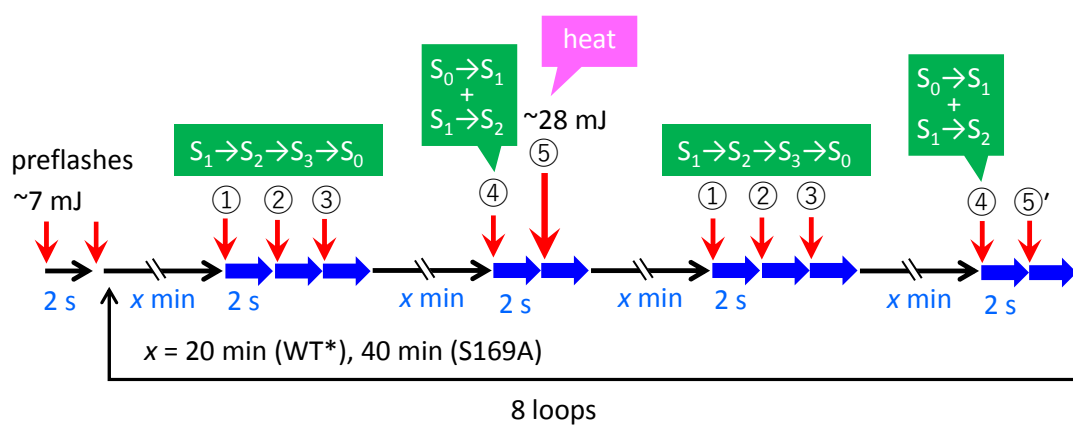

Figure S1. Scheme of the TRIR measurement.

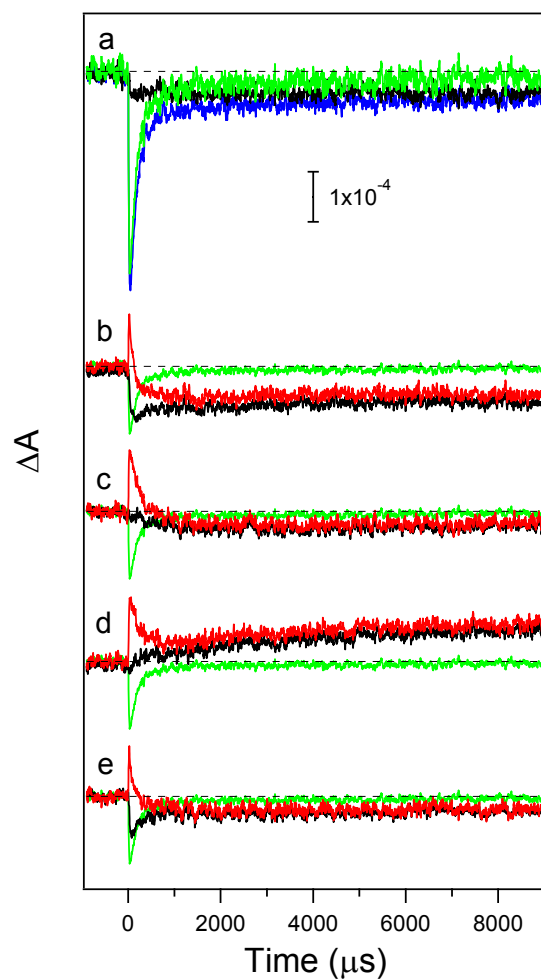

Figure S2. Example of heat-signal correction of the TRIR traces. (a) A heat signal corresponding to a laser power of  $21 \text{ mJ cm}^{-2} \text{ pulse}^{-1}$  (green line) was calculated by subtraction of a TRIR trace upon a flash with  $7 \text{ mJ cm}^{-2} \text{ pulse}^{-1}$  (black line) from that upon a flash with  $28 \text{ mJ cm}^{-2} \text{ pulse}^{-1}$  (blue line). (b–e) Heat-corrected TRIR traces (red lines) obtained by subtraction of a heat signal corresponding to a laser power of  $7 \text{ mJ cm}^{-2} \text{ pulse}^{-1}$  (green lines; the 1/3 intensity of the heat signal obtained in a) from raw TRIR traces (black lines) upon the (b) 1st, (c) 2nd, (d) 3rd, and (e) 4th (after dark interval) flashes with  $7 \text{ mJ cm}^{-2} \text{ pulse}^{-1}$ . The TRIR traces were recorded at  $1410 \text{ cm}^{-1}$  with the WT\* PSII core complexes.

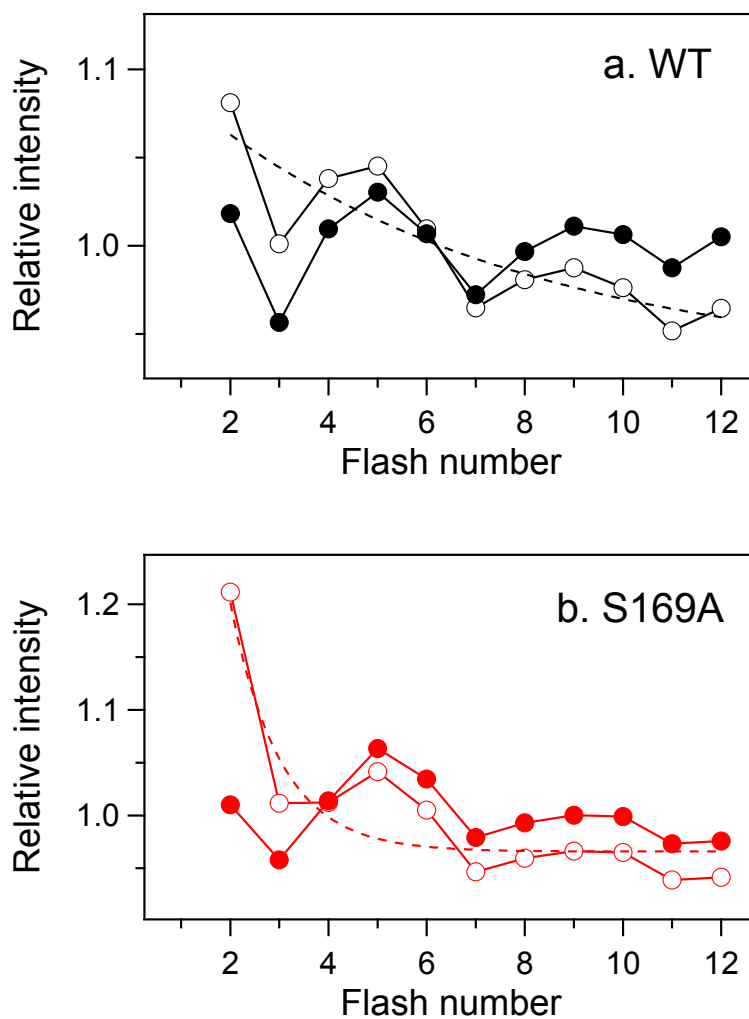

Figure S3. Baseline correction of the oscillation pattern of the ferrocyanide/ferricyanide FTIR signal of (a) WT\* and (b) D1-S169A PSII core complexes. The original data (open circles) were corrected (closed circles) using a baseline (dotted line) obtained by a single exponential fit.

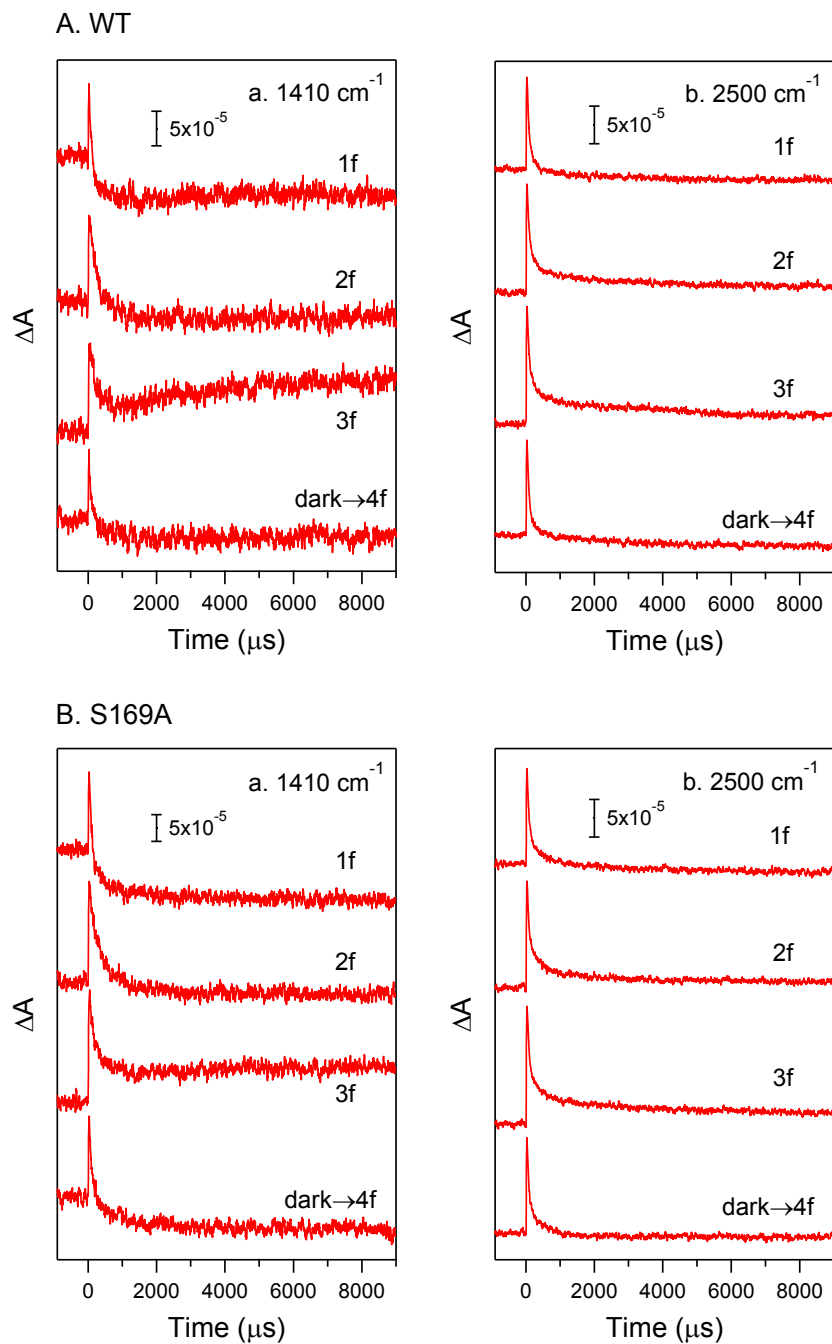

Figure S4. TRIR traces at 1st, 2nd, 3rd, and 4th (after dark interval) flashes detected at (a) 1410 and (b) 2500  $\text{cm}^{-1}$  in (A) WT\* and (B) D1-S169A PSII core complexes. All the traces were corrected with a heat signal (see Figure S2).

### Estimation of the pure TRIR trace of the $S_0 \rightarrow S_1$ transition

The procedure follows that in Shimizu et al.<sup>1</sup> except for using individual efficiencies of the S-state transitions. The intensities at 6 ms (average value between 5.7 and 6.3 ms) in the traces at  $1410 \text{ cm}^{-1}$  (Figure S4) at the 1st, 2nd, and 3rd flashes,  $A_1$ ,  $A_2$ , and  $A_3$ , respectively, which were corrected with a baseline shift in the simulation of the oscillation pattern, are expressed using the true  $\Delta A$  amplitudes,  $I_{12}$ ,  $I_{23}$ , and  $I_{30}$ , and the efficiencies,  $\alpha_1$ ,  $\alpha_2$ , and  $\alpha_3$ , of the  $S_1 \rightarrow S_2$ ,  $S_2 \rightarrow S_3$ , and  $S_3 \rightarrow S_0$  transitions, respectively:

$$A_1 = \alpha_1 I_{12}$$

$$A_2 = (1 - \alpha_1)\alpha_1 I_{12} + \alpha_1 \alpha_2 I_{23}$$

$$A_3 = (1 - \alpha_1)^2 \alpha_1 I_{12} + (2 - \alpha_1 - \alpha_2)\alpha_1 \alpha_2 I_{23} + \alpha_1 \alpha_2 \alpha_3 I_{30}$$

Thus,  $I_{12}$ ,  $I_{23}$ , and  $I_{30}$ , and the true amplitude of the  $S_0 \rightarrow S_1$  transition,  $I_{01}$ , are expressed as:

$$I_{12} = A_1 / \alpha_1$$

$$I_{23} = \{A_2 - (1 - \alpha_1)A_1\} / (\alpha_1 \alpha_2)$$

$$I_{30} = \{A_3 + (1 - \alpha_1)(1 - \alpha_2)A_1 - (2 - \alpha_1 - \alpha_2)A_2\} / (\alpha_1 \alpha_2 \alpha_3)$$

$$I_{01} = -(I_{12} + I_{23} + I_{30})$$

The base-line corrected intensity at the 4th flash,  $A_4$ , is expressed as:

$$A_4 = \{r + (1 - r)(I_{01}/I_{12})\}A_1$$

where  $r$  is the contribution of the  $S_1 \rightarrow S_2$  transition in the intensity at the 4th flash. Thus,  $r$  is obtained as:

$$r = (A_4/A_1 - I_{01}/I_{12}) / (1 - I_{01}/I_{12})$$

The values of  $r$  were estimated to be 0.68 and 0.79 in WT\* and D1-S169A, respectively.

The pure trace of the  $S_0 \rightarrow S_1$  transition,  $f_{01}$ , is obtained from the traces at the 1st and 4th flashes,  $f_1$  and  $f_4$ , as:

$$f_{01} = (f_4 - r f_1) / \{(1 - r)\alpha_3\}$$

### Reference

(1) Shimizu, T.; Sugiura, M.; Noguchi, T. Mechanism of proton-coupled electron transfer in the  $S_0$ -to- $S_1$  transition of photosynthetic water oxidation as revealed by

time-resolved infrared spectroscopy. *J. Phys. Chem. B* **2018**, *122*, 9460-9470.
